# Supplementary material
Source: publisher figshare collection journal article supplement (https://tandf.figshare.com/articles/dataset/_/22360803)
Supplement: Supplementary file 1 [file 1]

## Parental questionnaire

Where the responses are marked by parentheses ( ), please tick only **one** response for questions (X).

If multiple responses are possible, they are marked by circles **O**.

| Nr. |                                                                                                                                                                                                       | Continue with no. |
|-----|-------------------------------------------------------------------------------------------------------------------------------------------------------------------------------------------------------|-------------------|
| 1   | <p>Please fill in the <b>name of your child</b>, so that we can match the questionnaire. We will not use the name of your child in the analysis.</p> <p><i>(First name &amp; last name)</i></p> <hr/> | 2                 |

| 2                                     | <p>What is your relation to the child? Are you the mother, the father or a differently related person?</p> <p>Mother ( ) 3</p> <p>Father ( ) 3</p> <p>Relative or other person, namely: _____ 3</p>                                                                                                                                                                                                                                                                                                                                                                                                                                                                                                                                                             |                            |                            |                            |                            |                  |       |  |                 |     |     |     |     |     |   |                          |     |     |     |     |     |   |                                       |     |     |     |     |     |   |  |
|---------------------------------------|-----------------------------------------------------------------------------------------------------------------------------------------------------------------------------------------------------------------------------------------------------------------------------------------------------------------------------------------------------------------------------------------------------------------------------------------------------------------------------------------------------------------------------------------------------------------------------------------------------------------------------------------------------------------------------------------------------------------------------------------------------------------|----------------------------|----------------------------|----------------------------|----------------------------|------------------|-------|--|-----------------|-----|-----|-----|-----|-----|---|--------------------------|-----|-----|-----|-----|-----|---|---------------------------------------|-----|-----|-----|-----|-----|---|--|
| 3                                     | <p>How often do you or another family member engage in the following activities <b>in German</b> with your child?</p> <table border="0" style="width: 100%;"> <thead> <tr> <th></th> <th>Every day</th> <th>At least<br/>3x per<br/>week</th> <th>At least<br/>1x per<br/>week</th> <th>Less<br/>frequent</th> <th>never</th> <th></th> </tr> </thead> <tbody> <tr> <td>Telling stories</td> <td>( )</td> <td>( )</td> <td>( )</td> <td>( )</td> <td>( )</td> <td>4</td> </tr> <tr> <td>Reading aloud from books</td> <td>( )</td> <td>( )</td> <td>( )</td> <td>( )</td> <td>( )</td> <td>4</td> </tr> <tr> <td>Singing songs together with the child</td> <td>( )</td> <td>( )</td> <td>( )</td> <td>( )</td> <td>( )</td> <td>4</td> </tr> </tbody> </table> |                            | Every day                  | At least<br>3x per<br>week | At least<br>1x per<br>week | Less<br>frequent | never |  | Telling stories | ( ) | ( ) | ( ) | ( ) | ( ) | 4 | Reading aloud from books | ( ) | ( ) | ( ) | ( ) | ( ) | 4 | Singing songs together with the child | ( ) | ( ) | ( ) | ( ) | ( ) | 4 |  |
|                                       | Every day                                                                                                                                                                                                                                                                                                                                                                                                                                                                                                                                                                                                                                                                                                                                                       | At least<br>3x per<br>week | At least<br>1x per<br>week | Less<br>frequent           | never                      |                  |       |  |                 |     |     |     |     |     |   |                          |     |     |     |     |     |   |                                       |     |     |     |     |     |   |  |
| Telling stories                       | ( )                                                                                                                                                                                                                                                                                                                                                                                                                                                                                                                                                                                                                                                                                                                                                             | ( )                        | ( )                        | ( )                        | ( )                        | 4                |       |  |                 |     |     |     |     |     |   |                          |     |     |     |     |     |   |                                       |     |     |     |     |     |   |  |
| Reading aloud from books              | ( )                                                                                                                                                                                                                                                                                                                                                                                                                                                                                                                                                                                                                                                                                                                                                             | ( )                        | ( )                        | ( )                        | ( )                        | 4                |       |  |                 |     |     |     |     |     |   |                          |     |     |     |     |     |   |                                       |     |     |     |     |     |   |  |
| Singing songs together with the child | ( )                                                                                                                                                                                                                                                                                                                                                                                                                                                                                                                                                                                                                                                                                                                                                             | ( )                        | ( )                        | ( )                        | ( )                        | 4                |       |  |                 |     |     |     |     |     |   |                          |     |     |     |     |     |   |                                       |     |     |     |     |     |   |  |
| 4                                     | <p>How many <b>German</b> books are there in your household?</p> <p><i>Please only list "real" books, no booklets or magazines. Rough orientation: 1 meter in the shelf = approx. 50 books, please list the (approximate) number.</i></p> <p>Number of German books: _____</p>                                                                                                                                                                                                                                                                                                                                                                                                                                                                                  | 5                          |                            |                            |                            |                  |       |  |                 |     |     |     |     |     |   |                          |     |     |     |     |     |   |                                       |     |     |     |     |     |   |  |
| 5                                     | <p>Did your child, you, your partner, or at least one of your/your partner's parents migrate to Germany <b>after 1949</b>?</p> <p>No, none of us/them migrated. ( ) 6</p> <p>Yes, one or several persons migrated. ( ) 6</p>                                                                                                                                                                                                                                                                                                                                                                                                                                                                                                                                    |                            |                            |                            |                            |                  |       |  |                 |     |     |     |     |     |   |                          |     |     |     |     |     |   |                                       |     |     |     |     |     |   |  |

|    |                                                                                                                                                                            |   |
|----|----------------------------------------------------------------------------------------------------------------------------------------------------------------------------|---|
| 6  | <p>Do you speak any <b>languages besides German</b> in your family (also with closer relatives such as uncles, aunts, grandparents)?</p> <p>Yes ( ) 7</p> <p>No ( ) 15</p> |   |
| 7  | <p>Which languages besides German do you speak in your family?</p> <p><i>Please list all languages besides German.</i></p> <p>_____</p> <p>_____</p>                       | 8 |
| 8  | <p>Which language do you speak in your family most of the time?</p> <p><i>Please only fill in the language that is spoken most often in the family.</i></p> <p>_____</p>   | 9 |
| 9  | <p>At what age did your child first have <b>contact with the German language</b>?</p> <p>From birth ( ) 10</p> <p>At the age of _____ years and _____ months 10</p>        |   |
| 10 | <p>Does your child speak any <b>language(s) besides German</b>?</p> <p><i>If yes, please fill in all other languages.</i></p> <p>No ( ) 13</p>                             |   |

|                                       | Yes, namely: _____                                                                                                                                                                                                                                                                                                                                                                                                                                                                                                                                                                                                                                                                                                                                                  | 11                         |                            |                            |                            |                  |       |  |                 |     |     |     |     |     |    |                          |     |     |     |     |     |    |                                       |     |     |     |     |     |    |  |
|---------------------------------------|---------------------------------------------------------------------------------------------------------------------------------------------------------------------------------------------------------------------------------------------------------------------------------------------------------------------------------------------------------------------------------------------------------------------------------------------------------------------------------------------------------------------------------------------------------------------------------------------------------------------------------------------------------------------------------------------------------------------------------------------------------------------|----------------------------|----------------------------|----------------------------|----------------------------|------------------|-------|--|-----------------|-----|-----|-----|-----|-----|----|--------------------------|-----|-----|-----|-----|-----|----|---------------------------------------|-----|-----|-----|-----|-----|----|--|
| 11                                    | <p>If your child speaks another language/other languages, at what <b>age</b> did your child first come into <b>contact with that language/these languages</b>?</p> <p>From birth ( ) 12</p> <p>At the age of ____ years and ____ months 12</p>                                                                                                                                                                                                                                                                                                                                                                                                                                                                                                                      |                            |                            |                            |                            |                  |       |  |                 |     |     |     |     |     |    |                          |     |     |     |     |     |    |                                       |     |     |     |     |     |    |  |
| 12                                    | <p>How often do you or another family member engage in the following activities <b>in a language other than German</b> with your child?</p> <table border="0"> <thead> <tr> <th></th> <th>Every day</th> <th>At least<br/>3x per<br/>week</th> <th>At least<br/>1x per<br/>week</th> <th>Less<br/>frequent</th> <th>never</th> <th></th> </tr> </thead> <tbody> <tr> <td>Telling stories</td> <td>( )</td> <td>( )</td> <td>( )</td> <td>( )</td> <td>( )</td> <td>13</td> </tr> <tr> <td>Reading aloud from books</td> <td>( )</td> <td>( )</td> <td>( )</td> <td>( )</td> <td>( )</td> <td>13</td> </tr> <tr> <td>Singing songs together with the child</td> <td>( )</td> <td>( )</td> <td>( )</td> <td>( )</td> <td>( )</td> <td>13</td> </tr> </tbody> </table> |                            | Every day                  | At least<br>3x per<br>week | At least<br>1x per<br>week | Less<br>frequent | never |  | Telling stories | ( ) | ( ) | ( ) | ( ) | ( ) | 13 | Reading aloud from books | ( ) | ( ) | ( ) | ( ) | ( ) | 13 | Singing songs together with the child | ( ) | ( ) | ( ) | ( ) | ( ) | 13 |  |
|                                       | Every day                                                                                                                                                                                                                                                                                                                                                                                                                                                                                                                                                                                                                                                                                                                                                           | At least<br>3x per<br>week | At least<br>1x per<br>week | Less<br>frequent           | never                      |                  |       |  |                 |     |     |     |     |     |    |                          |     |     |     |     |     |    |                                       |     |     |     |     |     |    |  |
| Telling stories                       | ( )                                                                                                                                                                                                                                                                                                                                                                                                                                                                                                                                                                                                                                                                                                                                                                 | ( )                        | ( )                        | ( )                        | ( )                        | 13               |       |  |                 |     |     |     |     |     |    |                          |     |     |     |     |     |    |                                       |     |     |     |     |     |    |  |
| Reading aloud from books              | ( )                                                                                                                                                                                                                                                                                                                                                                                                                                                                                                                                                                                                                                                                                                                                                                 | ( )                        | ( )                        | ( )                        | ( )                        | 13               |       |  |                 |     |     |     |     |     |    |                          |     |     |     |     |     |    |                                       |     |     |     |     |     |    |  |
| Singing songs together with the child | ( )                                                                                                                                                                                                                                                                                                                                                                                                                                                                                                                                                                                                                                                                                                                                                                 | ( )                        | ( )                        | ( )                        | ( )                        | 13               |       |  |                 |     |     |     |     |     |    |                          |     |     |     |     |     |    |                                       |     |     |     |     |     |    |  |
| 13                                    | <p>Does your child attend classes <b>in a language other than German or English</b>?</p> <p><i>(e.g. heritage language classes in a private school, a cultural centre or similar)</i></p> <p>No ( ) 14</p> <p>Yes, namely in <i>(fill in language)</i>: _____ 14</p>                                                                                                                                                                                                                                                                                                                                                                                                                                                                                                |                            |                            |                            |                            |                  |       |  |                 |     |     |     |     |     |    |                          |     |     |     |     |     |    |                                       |     |     |     |     |     |    |  |
| 14                                    | <p>How would you rate your own proficiency in <b>German</b>?</p> <p><i>Please rate according to school grades.</i></p> <p>1: Very good ( ) 15</p>                                                                                                                                                                                                                                                                                                                                                                                                                                                                                                                                                                                                                   |                            |                            |                            |                            |                  |       |  |                 |     |     |     |     |     |    |                          |     |     |     |     |     |    |                                       |     |     |     |     |     |    |  |

|           |                                                                                                                               |                       |    |
|-----------|-------------------------------------------------------------------------------------------------------------------------------|-----------------------|----|
|           | 2: Good                                                                                                                       | ( )                   | 15 |
|           | 3: Satisfactory                                                                                                               | ( )                   | 15 |
|           | 4: Sufficient                                                                                                                 | ( )                   | 15 |
|           | 5: Poor                                                                                                                       | ( )                   | 15 |
|           | 6: Non-existent                                                                                                               | ( )                   | 15 |
| <b>15</b> | What is your <b>highest educational degree?</b>                                                                               |                       |    |
|           | Never been to school                                                                                                          | ( )                   | 16 |
|           | Currently a student                                                                                                           | ( )                   | 16 |
|           | Left school without a diploma                                                                                                 | ( )                   | 16 |
|           | Lower secondary education diploma (9 years of schooling) (Haupt-/ Volksschulabschluss)                                        | ( )                   | 16 |
|           | Middle secondary education diploma (10 years of schooling) (Realschulabschluss / Mittlere Reife)                              | ( )                   | 16 |
|           | High school diploma (after 12 years of schooling) (Fachhochschulreife)                                                        | ( )                   | 16 |
|           | Abitur/High school diploma (after 13/12 years of schooling, entitling you to study at university)                             | ( )                   | 16 |
|           | Other degree, namely:<br>_____                                                                                                |                       | 16 |
| <b>16</b> | Which <b>degrees of job training</b> do you have? Please select from the following list.<br><i>Multiple options possible.</i> |                       |    |
|           | Currently an apprentice or student (Auszubildende/r, Student/in)                                                              | <input type="radio"/> | 17 |
|           | No job training qualification/not in job training                                                                             | <input type="radio"/> | 17 |
|           | An apprenticeship diploma (Lehre)                                                                                             | <input type="radio"/> | 17 |
|           | A vocational school degree (Berufsfachschule, Handelsschule)                                                                  | <input type="radio"/> | 17 |
|           | A professional, technical, or vocational higher degree (Fachschule, Meister-, Technikerschule, Berufs- oder Fachakademie)     | <input type="radio"/> | 17 |

|           |                                                                                                                                                                                                                                                                                                                                |                       |    |
|-----------|--------------------------------------------------------------------------------------------------------------------------------------------------------------------------------------------------------------------------------------------------------------------------------------------------------------------------------|-----------------------|----|
|           | A university of applied science degree (Fachhochschulabschluss)                                                                                                                                                                                                                                                                | <input type="radio"/> | 17 |
|           | A university degree (Hochschulabschluss)                                                                                                                                                                                                                                                                                       | <input type="radio"/> | 17 |
|           | A doctor's degree/PhD (Promotion)                                                                                                                                                                                                                                                                                              | <input type="radio"/> | 17 |
| <b>17</b> | <b>How much do you work?</b>                                                                                                                                                                                                                                                                                                   |                       |    |
|           | Full time/all day (75-100%)                                                                                                                                                                                                                                                                                                    | ( )                   | 19 |
|           | Part time (25-75%)                                                                                                                                                                                                                                                                                                             | ( )                   | 19 |
|           | Occasionally (less than 25%, e.g. Minijob)                                                                                                                                                                                                                                                                                     | ( )                   | 19 |
|           | Unemployed                                                                                                                                                                                                                                                                                                                     | ( )                   | 18 |
| <b>18</b> | Have you ever been employed full-time or part-time?                                                                                                                                                                                                                                                                            |                       |    |
|           | Yes                                                                                                                                                                                                                                                                                                                            | ( )                   | 19 |
|           | No                                                                                                                                                                                                                                                                                                                             | ( )                   | 21 |
| <b>19</b> | Which occupation do you currently have? If you are no longer employed right now, which occupation did you have during your past employment?<br><i>Please fill in the occupation.</i><br><br>_____<br><br>Please describe the occupation precisely.<br><br>_____<br><br>Does this occupation have a specific name?<br><br>_____ |                       | 20 |
| <b>20</b> | Which position do you/did you have in the occupation you have/had?                                                                                                                                                                                                                                                             |                       |    |
|           | Worker                                                                                                                                                                                                                                                                                                                         |                       |    |
|           | Untrained                                                                                                                                                                                                                                                                                                                      | ( )                   | 21 |

|    |                                                                                                                                                                                                 |     |    |
|----|-------------------------------------------------------------------------------------------------------------------------------------------------------------------------------------------------|-----|----|
|    | Trained                                                                                                                                                                                         | ( ) | 21 |
|    | Skilled worker                                                                                                                                                                                  | ( ) | 21 |
|    | Foreman                                                                                                                                                                                         | ( ) | 21 |
|    | Master                                                                                                                                                                                          | ( ) | 21 |
|    | Employee                                                                                                                                                                                        |     |    |
|    | With operational tasks after general instruction (e.g. salesperson, data entry clerk, office assistant, caregiver assistant)                                                                    | ( ) | 21 |
|    | With operational authority to be executed after instruction (e.g. administrator, accountant, design draftsman)                                                                                  | ( ) | 21 |
|    | With staff responsibility (e. g. research assistants, general manager, department head or master with employment status)                                                                        | ( ) | 21 |
|    | With extensive executive functions and decision-making authority (e.g. director/manager, president of a company, member of managing-committee)                                                  | ( ) | 21 |
|    | Civil servant                                                                                                                                                                                   |     |    |
|    | Simple service (Einfacher Dienst)                                                                                                                                                               | ( ) | 21 |
|    | Clerical service (Mittlerer Dienst)                                                                                                                                                             | ( ) | 21 |
|    | Higher service (Gehobener Dienst)                                                                                                                                                               | ( ) | 21 |
|    | Senior service (Höherer Dienst)                                                                                                                                                                 | ( ) | 21 |
|    | Self-employed (in trade, the hotel and restaurant industry, in handcraft, in manufacturing, in service, also ME-PLC or PGH-member) or freelancer (physician, lawyer, tax accountant or similar) |     |    |
|    | Without employees                                                                                                                                                                               | ( ) | 21 |
|    | 1-4 employees                                                                                                                                                                                   | ( ) | 21 |
|    | 5 and more employees                                                                                                                                                                            | ( ) | 21 |
|    | Farmer with a self-owned farm                                                                                                                                                                   | ( ) | 21 |
|    | In training                                                                                                                                                                                     | ( ) | 21 |
|    | Federal volunteer service (Bundesfreiwilligendienst)                                                                                                                                            | ( ) | 21 |
| 21 | Do you live together with a partner (married or community) in your household?                                                                                                                   |     |    |

|           |                                                                                                                                                      |                       |    |
|-----------|------------------------------------------------------------------------------------------------------------------------------------------------------|-----------------------|----|
|           | Yes                                                                                                                                                  | ( )                   | 22 |
|           | No                                                                                                                                                   | ( )                   | 28 |
| <b>22</b> | Which is the highest educational degree of your <b>partner</b> ?                                                                                     |                       |    |
|           | Never been to school                                                                                                                                 | ( )                   | 23 |
|           | Currently a student                                                                                                                                  | ( )                   | 23 |
|           | Left school without a diploma                                                                                                                        | ( )                   | 23 |
|           | Lower secondary education diploma (9 years of schooling) (Haupt-/Volksschulabschluss)                                                                | ( )                   | 23 |
|           | Middle secondary education diploma (10 years of schooling) (Realschulabschluss / Mittlere Reife)                                                     | ( )                   | 23 |
|           | High school diploma (after 12 years of schooling) (Fachhochschulreife)                                                                               | ( )                   | 23 |
|           | Abitur/High school diploma (after 12/13 years of schooling, entitling you to study at university)                                                    | ( )                   | 23 |
|           | Other degree, namely:<br>_____                                                                                                                       |                       | 23 |
| <b>23</b> | Which degrees of job training does <b>your partner</b> have? What applies to him/her out of the following list?<br><i>Multiple options possible.</i> |                       |    |
|           | Currently an apprentice or student (Auszubildende/r, Student/in)                                                                                     | <input type="radio"/> | 24 |
|           | No job training qualification/not in job training                                                                                                    | <input type="radio"/> | 24 |
|           | An apprenticeship diploma (Lehre)                                                                                                                    | <input type="radio"/> | 24 |
|           | A vocational school degree (Berufsfachschule, Handelsschule)                                                                                         | <input type="radio"/> | 24 |
|           | A professional, technical, or vocational higher degree (Fachschule, Meister-, Technikerschule, Berufs- oder Fachakademie)                            | <input type="radio"/> | 24 |
|           | A university of applied science degree (Fachhochschulabschluss)                                                                                      | <input type="radio"/> | 24 |
|           | A university degree (Hochschulabschluss)                                                                                                             | <input type="radio"/> | 24 |
|           | A doctor's degree/PhD (Promotion)                                                                                                                    | <input type="radio"/> | 24 |



|    |                                                                                                                                                                                                                                                                                                                                                                         |    |
|----|-------------------------------------------------------------------------------------------------------------------------------------------------------------------------------------------------------------------------------------------------------------------------------------------------------------------------------------------------------------------------|----|
|    |                                                                                                                                                                                                                                                                                                                                                                         |    |
| 24 | <p>How much does <b>your partner</b> work?</p> <p>Full time/all day (75-100%) ( ) 26</p> <p>Part time (25-75%) ( ) 26</p> <p>Occasionally (less than 25%, e.g. Minijob) ( ) 26</p> <p>Unemployed ( ) 25</p>                                                                                                                                                             |    |
| 25 | <p>Has your <b>partner</b> ever been employed full-time or part-time?</p> <p>Yes ( ) 26</p> <p>No ( ) 28</p>                                                                                                                                                                                                                                                            |    |
| 26 | <p>Which occupation does <b>your partner</b> currently have? If he/she is no longer employed at the moment, which occupation did he/she have during his/her past employment?</p> <p><i>Please fill in the occupation.</i></p> <p>_____</p> <p>Please describe the occupation precisely.</p> <p>_____</p> <p>Does this occupation have a specific name?</p> <p>_____</p> | 27 |
| 27 | <p>Which position does/did <b>your partner</b> have in the occupation he/she practice(ed) mostly?</p> <p>Worker</p> <p>Untrained ( ) 28</p> <p>Trained ( ) 28</p> <p>Skilled worker ( ) 28</p>                                                                                                                                                                          |    |

|                                                                                                                                                                                                 |     |    |
|-------------------------------------------------------------------------------------------------------------------------------------------------------------------------------------------------|-----|----|
| Foreman                                                                                                                                                                                         | ( ) | 28 |
| Master                                                                                                                                                                                          | ( ) | 28 |
| Employee                                                                                                                                                                                        |     |    |
| With operational tasks after general instruction (e.g. salesperson, data entry clerk, office assistant, caregiver assistant)                                                                    | ( ) | 28 |
| With operational authority to be executed after instruction (e.g. administrator, accountant, design draftsman)                                                                                  | ( ) | 28 |
| With staff responsibility (e. g. research assistants, general manager, department head or master with employment status)                                                                        | ( ) | 28 |
| With extensive executive functions and decision-making authority (e.g. director/manager, president of a company, member of managing-committee)                                                  | ( ) | 28 |
| Civil servant                                                                                                                                                                                   |     |    |
| Simple service (Einfacher Dienst)                                                                                                                                                               | ( ) | 28 |
| Clerical service (Mittlerer Dienst)                                                                                                                                                             | ( ) | 28 |
| Higher service (Gehobener Dienst)                                                                                                                                                               | ( ) | 28 |
| Senior service (Höherer Dienst)                                                                                                                                                                 | ( ) | 28 |
| Self-employed (in trade, the hotel and restaurant industry, in handcraft, in manufacturing, in service, also ME-PLC or PGH-member) or freelancer (physician, lawyer, tax accountant or similar) |     |    |
| Without employees                                                                                                                                                                               | ( ) | 28 |
| 1-4 employees                                                                                                                                                                                   | ( ) | 28 |
| 5 and more employees                                                                                                                                                                            | ( ) | 28 |
| Farmer with a self-owned farm                                                                                                                                                                   | ( ) | 28 |
| In training                                                                                                                                                                                     | ( ) | 28 |
| Federal volunteer service (Bundesfreiwilligendienst)                                                                                                                                            | ( ) | 28 |

|                |                                                                                                                                                                                                                                                                                                                                                                                                                                                                                                                                                                                                                                                                                                                                                                                                                                                                                                                                                                                                                                                                                                                                                                                                                                      |                      |           |     |        |           |     |        |           |     |              |             |     |                |             |     |                |             |     |                |             |     |                |             |     |                |             |     |                |             |     |                |             |     |                |             |     |                |             |     |                |             |     |                |             |     |  |
|----------------|--------------------------------------------------------------------------------------------------------------------------------------------------------------------------------------------------------------------------------------------------------------------------------------------------------------------------------------------------------------------------------------------------------------------------------------------------------------------------------------------------------------------------------------------------------------------------------------------------------------------------------------------------------------------------------------------------------------------------------------------------------------------------------------------------------------------------------------------------------------------------------------------------------------------------------------------------------------------------------------------------------------------------------------------------------------------------------------------------------------------------------------------------------------------------------------------------------------------------------------|----------------------|-----------|-----|--------|-----------|-----|--------|-----------|-----|--------------|-------------|-----|----------------|-------------|-----|----------------|-------------|-----|----------------|-------------|-----|----------------|-------------|-----|----------------|-------------|-----|----------------|-------------|-----|----------------|-------------|-----|----------------|-------------|-----|----------------|-------------|-----|----------------|-------------|-----|----------------|-------------|-----|--|
| 28             | <p>How high is the average monthly net income of your household in total? This sum refers to the sum of all income (<b>of all persons contributing to the household income</b>) after taxes and social security contributions.</p> <p>We ensure that your response will not be analysed on an individual level.</p> <p><i>The average monthly net income of your household refers to the sum that results from wages, earnings, income from personal practice, and pensions. Please also include earnings from social services, income from renting or leases, inheritances, housing benefits, child allowances. Please subtract taxes and social security contributions afterwards.</i></p> <p><i>If you are self-employed, average net income, after operating expenses and taxes.</i></p> <p>Please fill in your household net income: _____ Euros</p> <p>I prefer not to say ( )</p>                                                                                                                                                                                                                                                                                                                                             | <p>end</p> <p>29</p> |           |     |        |           |     |        |           |     |              |             |     |                |             |     |                |             |     |                |             |     |                |             |     |                |             |     |                |             |     |                |             |     |                |             |     |                |             |     |                |             |     |                |             |     |  |
| 29             | <p>If you cannot or do not want to list an exact number, please let us know which of the following categories best suits the net income of your household?</p> <table border="0"> <tr> <td>under</td> <td>150 Euros</td> <td>( )</td> </tr> <tr> <td>150 to</td> <td>450 Euros</td> <td>( )</td> </tr> <tr> <td>451 to</td> <td>850 Euros</td> <td>( )</td> </tr> <tr> <td>851 to under</td> <td>1 000 Euros</td> <td>( )</td> </tr> <tr> <td>1 000 to under</td> <td>1 250 Euros</td> <td>( )</td> </tr> <tr> <td>1 250 to under</td> <td>1 500 Euros</td> <td>( )</td> </tr> <tr> <td>1 500 to under</td> <td>1 750 Euros</td> <td>( )</td> </tr> <tr> <td>1 750 to under</td> <td>2 000 Euros</td> <td>( )</td> </tr> <tr> <td>2 000 to under</td> <td>2 250 Euros</td> <td>( )</td> </tr> <tr> <td>2 250 to under</td> <td>2 500 Euros</td> <td>( )</td> </tr> <tr> <td>2 500 to under</td> <td>2 750 Euros</td> <td>( )</td> </tr> <tr> <td>2 750 to under</td> <td>3 000 Euros</td> <td>( )</td> </tr> <tr> <td>3 000 to under</td> <td>3 250 Euros</td> <td>( )</td> </tr> <tr> <td>3 250 to under</td> <td>3 500 Euros</td> <td>( )</td> </tr> <tr> <td>3 500 to under</td> <td>3 750 Euros</td> <td>( )</td> </tr> </table> | under                | 150 Euros | ( ) | 150 to | 450 Euros | ( ) | 451 to | 850 Euros | ( ) | 851 to under | 1 000 Euros | ( ) | 1 000 to under | 1 250 Euros | ( ) | 1 250 to under | 1 500 Euros | ( ) | 1 500 to under | 1 750 Euros | ( ) | 1 750 to under | 2 000 Euros | ( ) | 2 000 to under | 2 250 Euros | ( ) | 2 250 to under | 2 500 Euros | ( ) | 2 500 to under | 2 750 Euros | ( ) | 2 750 to under | 3 000 Euros | ( ) | 3 000 to under | 3 250 Euros | ( ) | 3 250 to under | 3 500 Euros | ( ) | 3 500 to under | 3 750 Euros | ( ) |  |
| under          | 150 Euros                                                                                                                                                                                                                                                                                                                                                                                                                                                                                                                                                                                                                                                                                                                                                                                                                                                                                                                                                                                                                                                                                                                                                                                                                            | ( )                  |           |     |        |           |     |        |           |     |              |             |     |                |             |     |                |             |     |                |             |     |                |             |     |                |             |     |                |             |     |                |             |     |                |             |     |                |             |     |                |             |     |                |             |     |  |
| 150 to         | 450 Euros                                                                                                                                                                                                                                                                                                                                                                                                                                                                                                                                                                                                                                                                                                                                                                                                                                                                                                                                                                                                                                                                                                                                                                                                                            | ( )                  |           |     |        |           |     |        |           |     |              |             |     |                |             |     |                |             |     |                |             |     |                |             |     |                |             |     |                |             |     |                |             |     |                |             |     |                |             |     |                |             |     |                |             |     |  |
| 451 to         | 850 Euros                                                                                                                                                                                                                                                                                                                                                                                                                                                                                                                                                                                                                                                                                                                                                                                                                                                                                                                                                                                                                                                                                                                                                                                                                            | ( )                  |           |     |        |           |     |        |           |     |              |             |     |                |             |     |                |             |     |                |             |     |                |             |     |                |             |     |                |             |     |                |             |     |                |             |     |                |             |     |                |             |     |                |             |     |  |
| 851 to under   | 1 000 Euros                                                                                                                                                                                                                                                                                                                                                                                                                                                                                                                                                                                                                                                                                                                                                                                                                                                                                                                                                                                                                                                                                                                                                                                                                          | ( )                  |           |     |        |           |     |        |           |     |              |             |     |                |             |     |                |             |     |                |             |     |                |             |     |                |             |     |                |             |     |                |             |     |                |             |     |                |             |     |                |             |     |                |             |     |  |
| 1 000 to under | 1 250 Euros                                                                                                                                                                                                                                                                                                                                                                                                                                                                                                                                                                                                                                                                                                                                                                                                                                                                                                                                                                                                                                                                                                                                                                                                                          | ( )                  |           |     |        |           |     |        |           |     |              |             |     |                |             |     |                |             |     |                |             |     |                |             |     |                |             |     |                |             |     |                |             |     |                |             |     |                |             |     |                |             |     |                |             |     |  |
| 1 250 to under | 1 500 Euros                                                                                                                                                                                                                                                                                                                                                                                                                                                                                                                                                                                                                                                                                                                                                                                                                                                                                                                                                                                                                                                                                                                                                                                                                          | ( )                  |           |     |        |           |     |        |           |     |              |             |     |                |             |     |                |             |     |                |             |     |                |             |     |                |             |     |                |             |     |                |             |     |                |             |     |                |             |     |                |             |     |                |             |     |  |
| 1 500 to under | 1 750 Euros                                                                                                                                                                                                                                                                                                                                                                                                                                                                                                                                                                                                                                                                                                                                                                                                                                                                                                                                                                                                                                                                                                                                                                                                                          | ( )                  |           |     |        |           |     |        |           |     |              |             |     |                |             |     |                |             |     |                |             |     |                |             |     |                |             |     |                |             |     |                |             |     |                |             |     |                |             |     |                |             |     |                |             |     |  |
| 1 750 to under | 2 000 Euros                                                                                                                                                                                                                                                                                                                                                                                                                                                                                                                                                                                                                                                                                                                                                                                                                                                                                                                                                                                                                                                                                                                                                                                                                          | ( )                  |           |     |        |           |     |        |           |     |              |             |     |                |             |     |                |             |     |                |             |     |                |             |     |                |             |     |                |             |     |                |             |     |                |             |     |                |             |     |                |             |     |                |             |     |  |
| 2 000 to under | 2 250 Euros                                                                                                                                                                                                                                                                                                                                                                                                                                                                                                                                                                                                                                                                                                                                                                                                                                                                                                                                                                                                                                                                                                                                                                                                                          | ( )                  |           |     |        |           |     |        |           |     |              |             |     |                |             |     |                |             |     |                |             |     |                |             |     |                |             |     |                |             |     |                |             |     |                |             |     |                |             |     |                |             |     |                |             |     |  |
| 2 250 to under | 2 500 Euros                                                                                                                                                                                                                                                                                                                                                                                                                                                                                                                                                                                                                                                                                                                                                                                                                                                                                                                                                                                                                                                                                                                                                                                                                          | ( )                  |           |     |        |           |     |        |           |     |              |             |     |                |             |     |                |             |     |                |             |     |                |             |     |                |             |     |                |             |     |                |             |     |                |             |     |                |             |     |                |             |     |                |             |     |  |
| 2 500 to under | 2 750 Euros                                                                                                                                                                                                                                                                                                                                                                                                                                                                                                                                                                                                                                                                                                                                                                                                                                                                                                                                                                                                                                                                                                                                                                                                                          | ( )                  |           |     |        |           |     |        |           |     |              |             |     |                |             |     |                |             |     |                |             |     |                |             |     |                |             |     |                |             |     |                |             |     |                |             |     |                |             |     |                |             |     |                |             |     |  |
| 2 750 to under | 3 000 Euros                                                                                                                                                                                                                                                                                                                                                                                                                                                                                                                                                                                                                                                                                                                                                                                                                                                                                                                                                                                                                                                                                                                                                                                                                          | ( )                  |           |     |        |           |     |        |           |     |              |             |     |                |             |     |                |             |     |                |             |     |                |             |     |                |             |     |                |             |     |                |             |     |                |             |     |                |             |     |                |             |     |                |             |     |  |
| 3 000 to under | 3 250 Euros                                                                                                                                                                                                                                                                                                                                                                                                                                                                                                                                                                                                                                                                                                                                                                                                                                                                                                                                                                                                                                                                                                                                                                                                                          | ( )                  |           |     |        |           |     |        |           |     |              |             |     |                |             |     |                |             |     |                |             |     |                |             |     |                |             |     |                |             |     |                |             |     |                |             |     |                |             |     |                |             |     |                |             |     |  |
| 3 250 to under | 3 500 Euros                                                                                                                                                                                                                                                                                                                                                                                                                                                                                                                                                                                                                                                                                                                                                                                                                                                                                                                                                                                                                                                                                                                                                                                                                          | ( )                  |           |     |        |           |     |        |           |     |              |             |     |                |             |     |                |             |     |                |             |     |                |             |     |                |             |     |                |             |     |                |             |     |                |             |     |                |             |     |                |             |     |                |             |     |  |
| 3 500 to under | 3 750 Euros                                                                                                                                                                                                                                                                                                                                                                                                                                                                                                                                                                                                                                                                                                                                                                                                                                                                                                                                                                                                                                                                                                                                                                                                                          | ( )                  |           |     |        |           |     |        |           |     |              |             |     |                |             |     |                |             |     |                |             |     |                |             |     |                |             |     |                |             |     |                |             |     |                |             |     |                |             |     |                |             |     |                |             |     |  |

|  |        |                |              |     |  |
|--|--------|----------------|--------------|-----|--|
|  | 3 750  | to under       | 4 000 Euros  | ( ) |  |
|  | 4 000  | to under       | 4 500 Euros  | ( ) |  |
|  | 4 500  | to under       | 5 000 Euros  | ( ) |  |
|  | 5 000  | to under       | 5 500 Euros  | ( ) |  |
|  | 5 500  | to under       | 6 000 Euros  | ( ) |  |
|  | 6 000  | to under       | 7 500 Euros  | ( ) |  |
|  | 7 500  | to under       | 10 000 Euros | ( ) |  |
|  | 10 000 | to under       | 20 000 Euros | ( ) |  |
|  | 20 000 | Euros and more |              | ( ) |  |

**Thank you for your participation!**
